# Supplementary material
Source: publisher site journal article supplement (http://www.dovepress.com/get_supplementary_file.php?f=296280.docx)
Supplement: Supplementary file 1 [file get_supplementary_file.php]

# **Appendix I**

## Table S1: Search Strategies by Database

| **PubMed** | | |
| --- | --- | --- |
| **No.** | **Query** | **Results** |
|  | ("Cardiovascular Diseases"[Mesh] OR "cardiovascular disease" OR "cardiovascular diseases" OR hypertension [tiab] OR "high blood pressure" OR "elevated blood pressure") AND (medication adherence[MeSH Terms] OR "medication adherence" OR "medication compliance" OR ((drug [tiab] OR drugs [tiab] OR medicat* [tiab]) AND (complian [tiab] OR adher* [tiab]))) AND ("Clinical Study" [Publication Type] OR "Evaluation Studies as Topic"[Mesh] OR "Evaluation Studies" [Publication Type] OR "Clinical Trials as Topic"[Mesh] OR interven* [tiab] OR program* [tiab] OR strateg* [tiab] OR random* [tiab] OR effective* [tw] OR evaluat* [tw] OR quantitative [tiab] OR qualitative [tiab]) AND ((((Macedonia[tw] OR Madagascar[tw] OR Malagasy Republic[tw] OR Malaysia[tw] OR Malaya[tw] OR Malay[tw] OR Sabah[tw] OR Sarawak[tw] OR Malawi[tw] OR Nyasaland[tw] OR Mali[tw] OR Malta[tw] OR Marshall Islands[tw] OR Mauritania[tw] OR Mauritius[tw] OR Agalega Islands[tw] OR Mexico[tw] OR Micronesia[tw] OR Middle East[tw] OR Moldova[tw] OR Moldovia[tw] OR Moldovian[tw] OR Mongolia[tw] OR Montenegro[tw] OR Morocco[tw] OR Ifni[tw] OR Mozambique[tw] OR Myanmar[tw] OR Myanma[tw] OR Burma[tw] OR Namibia[tw] OR Nepal[tw] OR Netherlands Antilles[tw] OR New Caledonia[tw] OR Nicaragua[tw] OR Niger[tw] OR Nigeria[tw] OR Northern Mariana Islands[tw] OR Oman[tw] OR Muscat[tw] OR Pakistan[tw] OR Palau[tw] OR Palestine[tw] OR Panama[tw] OR Paraguay[tw] OR Peru[tw] OR Philippines[tw] OR Philipines[tw] OR Phillipines[tw] OR Phillippines[tw] OR Poland[tw] OR Portugal[tw] OR Puerto Rico[tw] OR Romania[tw] OR Rumania[tw] OR Roumania[tw] OR Russia[tw] OR Russian[tw] OR Rwanda[tw] OR Ruanda[tw] OR Saint Kitts[tw] OR St Kitts[tw] OR Nevis[tw] OR Saint Lucia[tw] OR St Lucia[tw] OR Saint Vincent[tw] OR St Vincent[tw] OR Grenadines[tw] OR Samoa[tw] OR Samoan Islands[tw] OR Navigator Island[tw] OR Navigator Islands[tw] OR Sao Tome[tw] OR Saudi Arabia[tw] OR Senegal[tw] OR Serbia[tw] OR Montenegro[tw] OR Seychelles[tw] OR Sierra Leone[tw] OR Slovenia[tw] OR Sri Lanka[tw] OR Ceylon[tw] OR Solomon Islands[tw] OR Somalia[tw] OR Sudan[tw] OR Suriname[tw] OR Surinam[tw] OR Swaziland[tw] OR Syria[tw] OR Tajikistan[tw] OR Tadzhikistan[tw] OR Tadjikistan[tw] OR Tadzhik[tw] OR Tanzania[tw] OR Thailand[tw] OR Togo[tw] OR Togolese Republic[tw] OR Tonga[tw] OR Trinidad[tw] OR Tobago[tw] OR Tunisia[tw] OR Turkey[tw] OR Turkmenistan[tw] OR Turkmen[tw] OR Uganda[tw] OR Ukraine[tw] OR Uruguay[tw] OR USSR[tw] OR Soviet Union[tw] OR Union of Soviet Socialist Republics[tw] OR Uzbekistan[tw] OR Uzbek OR Vanuatu[tw] OR New Hebrides[tw] OR Venezuela[tw] OR Vietnam[tw] OR Viet Nam[tw] OR West Bank[tw] OR Yemen[tw] OR Yugoslavia[tw] OR Zambia[tw] OR Zimbabwe[tw] OR Rhodesia[tw]) OR ("developing country"[tw] OR "developing countries"[tw] OR "developing nation"[tw] OR "developing nations"[tw] OR "developing population"[tw] OR "developing populations"[tw] OR "developing world"[tw] OR "less developed country"[tw] OR "less developed countries"[tw] OR "less developed nation"[tw] OR "less developed nations"[tw] OR "less developed population"[tw] OR "less developed populations"[tw] OR "less developed world"[tw] OR "lesser developed country"[tw] OR "lesser developed countries"[tw] OR "lesser developed nation"[tw] OR "lesser developed nations"[tw] OR "lesser developed population"[tw] OR "lesser developed populations"[tw] OR "lesser developed world"[tw] OR "under developed country"[tw] OR "under developed countries"[tw] OR "under developed nation"[tw] OR "under developed nations"[tw] OR "under developed population"[tw] OR "under developed populations"[tw] OR "under developed world"[tw] OR "underdeveloped country"[tw] OR "underdeveloped countries"[tw] OR "underdeveloped nation"[tw] OR "underdeveloped nations"[tw] OR "underdeveloped population"[tw] OR "underdeveloped populations"[tw] OR "underdeveloped world"[tw] OR "middle income country"[tw] OR "middle income countries"[tw] OR "middle income nation"[tw] OR "middle income nations"[tw] OR "middle income population"[tw] OR "middle income populations"[tw] OR "low income country"[tw] OR "low income countries"[tw] OR "low income nation"[tw] OR "low income nations"[tw] OR "low income population"[tw] OR "low income populations"[tw] OR "lower income country"[tw] OR "lower income countries"[tw] OR "lower income nation"[tw] OR "lower income nations"[tw] OR "lower income population"[tw] OR "lower income populations"[tw] OR "underserved country"[tw] OR "underserved countries"[tw] OR "underserved nation"[tw] OR "underserved nations"[tw] OR "underserved population"[tw] OR "underserved populations"[tw] OR "underserved world"[tw] OR "under served country"[tw] OR "under served countries"[tw] OR "under served nation"[tw] OR "under served nations"[tw] OR "under served population"[tw] OR "under served populations"[tw] OR "under served world"[tw] OR "deprived country"[tw] OR "deprived countries"[tw] OR "deprived nation"[tw] OR "deprived nations"[tw] OR "deprived population"[tw] OR "deprived populations"[tw] OR "deprived world"[tw] OR "poor country"[tw] OR "poor countries"[tw] OR "poor nation"[tw] OR "poor nations"[tw] OR "poor population"[tw] OR "poor populations"[tw] OR "poor world"[tw] OR "poorer country"[tw] OR "poorer countries"[tw] OR "poorer nation"[tw] OR "poorer nations"[tw] OR "poorer population"[tw] OR "poorer populations"[tw] OR "poorer world"[tw] OR "developing economy"[tw] OR "developing economies"[tw] OR "less developed economy"[tw] OR "less developed economies"[tw] OR "lesser developed economy"[tw] OR "lesser developed economies"[tw] OR "under developed economy"[tw] OR "under developed economies"[tw] OR "underdeveloped economy"[tw] OR "underdeveloped economies"[tw] OR "middle income economy"[tw] OR "middle income economies"[tw] OR "low income economy"[tw] OR "low income economies"[tw] OR "lower income economy"[tw] OR "lower income economies"[tw] OR "low gdp"[tw] OR "low gnp"[tw] OR "low gross domestic"[tw] OR "low gross national"[tw] OR "lower gdp"[tw] OR "lower gnp"[tw] OR "lower gross domestic"[tw] OR "lower gross national"[tw] OR lmic[tw] OR lmics[tw] OR "third world"[tw] OR "lami country"[tw] OR "lami countries"[tw] OR "transitional country"[tw] OR "transitional countries"[tw])) OR (Africa[tw] OR Asia[tw] OR Caribbean[tw] OR West Indies[tw] OR South America[tw] OR Latin America[tw] OR Central America[tw] OR Afghanistan[tw] OR Albania[tw] OR Algeria[tw] OR Angola[tw] OR Antigua[tw] OR Barbuda[tw] OR Argentina[tw] OR Armenia[tw] OR Armenian[tw] OR Aruba[tw] OR Azerbaijan[tw] OR Bahrain[tw] OR Bangladesh[tw] OR Barbados[tw] OR Benin[tw] OR Byelarus[tw] OR Byelorussian[tw] OR Belarus[tw] OR Belorussian[tw] OR Belorussia[tw] OR Belize[tw] OR Bhutan[tw] OR Bolivia[tw] OR Bosnia[tw] OR Herzegovina[tw] OR Hercegovina[tw] OR Botswana[tw] OR Brasil[tw] OR Brazil[tw] OR Bulgaria[tw] OR Burkina Faso[tw] OR Burkina Fasso[tw] OR Upper Volta[tw] OR Burundi[tw] OR Urundi[tw] OR Cambodia[tw] OR Khmer Republic[tw] OR Kampuchea[tw] OR Cameroon[tw] OR Cameroons[tw] OR Cameron[tw] OR Camerons[tw] OR Cape Verde[tw] OR Central African Republic[tw] OR Chad[tw] OR Chile[tw] OR China[tw] OR Colombia[tw] OR Comoros[tw] OR Comoro Islands[tw] OR Comores[tw] OR Mayotte[tw] OR Congo[tw] OR Zaire[tw] OR Costa Rica[tw] OR Cote d'Ivoire[tw] OR Ivory Coast[tw] OR Croatia[tw] OR Cuba[tw] OR Cyprus[tw] OR Czechoslovakia[tw] OR Czech Republic[tw] OR Slovakia[tw] OR Slovak Republic[tw] OR Djibouti[tw] OR French Somaliland[tw] OR Dominica[tw] OR Dominican Republic[tw] OR East Timor[tw] OR East Timur[tw] OR Timor Leste[tw] OR Ecuador[tw] OR Egypt[tw] OR United Arab Republic[tw] OR El Salvador[tw] OR Eritrea[tw] OR Estonia[tw] OR Ethiopia[tw] OR Fiji[tw] OR Gabon[tw] OR Gabonese Republic[tw] OR Gambia[tw] OR Gaza[tw] OR Georgia Republic[tw] OR Georgian Republic[tw] OR Ghana[tw] OR Gold Coast[tw] OR Greece[tw] OR Grenada[tw] OR Guatemala[tw] OR Guinea[tw] OR Guam[tw] OR Guiana[tw] OR Guyana[tw] OR Haiti[tw] OR Honduras[tw] OR Hungary[tw] OR India[tw] OR Maldives[tw] OR Indonesia[tw] OR Iran[tw] OR Iraq[tw] OR Isle of Man[tw] OR Jamaica[tw] OR Jordan[tw] OR Kazakhstan[tw] OR Kazakh[tw] OR Kenya[tw] OR Kiribati[tw] OR Korea[tw] OR Kosovo[tw] OR Kyrgyzstan[tw] OR Kirghizia[tw] OR Kyrgyz Republic[tw] OR Kirghiz[tw] OR Kirgizstan[tw] OR "Lao PDR"[tw] OR Laos[tw] OR Latvia[tw] OR Lebanon[tw] OR Lesotho[tw] OR Basutoland[tw] OR Liberia[tw] OR Libya[tw] OR Lithuania[tw])) OR (Developing Countries[Mesh:noexp] OR Africa[Mesh:noexp] OR Africa, Northern[Mesh:noexp] OR Africa South of the Sahara[Mesh:noexp] OR Africa, Central[Mesh:noexp] OR Africa, Eastern[Mesh:noexp] OR Africa, Southern[Mesh:noexp] OR Africa, Western[Mesh:noexp] OR Asia[Mesh:noexp] OR Asia, Central[Mesh:noexp] OR Asia, Southeastern[Mesh:noexp] OR Asia, Western[Mesh:noexp] OR Caribbean Region[Mesh:noexp] OR West Indies[Mesh:noexp] OR South America[Mesh:noexp] OR Latin America[Mesh:noexp] OR Central America[Mesh:noexp] OR Afghanistan[Mesh:noexp] OR Albania[Mesh:noexp] OR Algeria[Mesh:noexp] OR American Samoa[Mesh:noexp] OR Angola[Mesh:noexp] OR "Antigua and Barbuda"[Mesh:noexp] OR Argentina[Mesh:noexp] OR Armenia[Mesh:noexp] OR Azerbaijan[Mesh:noexp] OR Bahrain[Mesh:noexp] OR Bangladesh[Mesh:noexp] OR Barbados[Mesh:noexp] OR Benin[Mesh:noexp] OR Byelarus[Mesh:noexp] OR Belize[Mesh:noexp] OR Bhutan[Mesh:noexp] OR Bolivia[Mesh:noexp] OR Bosnia | Searched 1/6/2020  822 citations |
|  | Herzegovina[Mesh:noexp] OR Botswana[Mesh:noexp] OR Brazil[Mesh:noexp] OR Bulgaria[Mesh:noexp] OR Burkina Faso[Mesh:noexp] OR Burundi[Mesh:noexp] OR Cambodia[Mesh:noexp] OR Cameroon[Mesh:noexp] OR Cape Verde[Mesh:noexp] OR Central African Republic[Mesh:noexp] OR Chad[Mesh:noexp] OR Chile[Mesh:noexp] OR China[Mesh:noexp] OR Colombia[Mesh:noexp] OR Comoros[Mesh:noexp] OR Congo[Mesh:noexp] OR Costa Rica[Mesh:noexp] OR Cote d'Ivoire[Mesh:noexp] OR Croatia[Mesh:noexp] OR Cuba[Mesh:noexp] OR Cyprus[Mesh:noexp] OR Czechoslovakia[Mesh:noexp] OR Czech Republic[Mesh:noexp] OR Slovakia[Mesh:noexp] OR Djibouti[Mesh:noexp] OR "Democratic Republic of the Congo"[Mesh:noexp] OR Dominica[Mesh:noexp] OR Dominican Republic[Mesh:noexp] OR East Timor[Mesh:noexp] OR Ecuador[Mesh:noexp] OR Egypt[Mesh:noexp] OR El Salvador[Mesh:noexp] OR Eritrea[Mesh:noexp] OR Estonia[Mesh:noexp] OR Ethiopia[Mesh:noexp] OR Fiji[Mesh:noexp] OR Gabon[Mesh:noexp] OR Gambia[Mesh:noexp] OR "Georgia (Republic)"[Mesh:noexp] OR Ghana[Mesh:noexp] OR Greece[Mesh:noexp] OR Grenada[Mesh:noexp] OR Guatemala[Mesh:noexp] OR Guinea[Mesh:noexp] OR Guinea |  |
|  | Bissau[Mesh:noexp] OR Guam[Mesh:noexp] OR Guyana[Mesh:noexp] OR Haiti[Mesh:noexp] OR Honduras[Mesh:noexp] OR Hungary[Mesh:noexp] OR India[Mesh:noexp] OR Indonesia[Mesh:noexp] OR Iran[Mesh:noexp] OR Iraq[Mesh:noexp] OR Jamaica[Mesh:noexp] OR Jordan[Mesh:noexp] OR Kazakhstan[Mesh:noexp] OR Kenya[Mesh:noexp] OR Korea[Mesh:noexp] OR Kosovo[Mesh:noexp] OR Kyrgyzstan[Mesh:noexp] OR Laos[Mesh:noexp] OR Latvia[Mesh:noexp] OR Lebanon[Mesh:noexp] OR Lesotho[Mesh:noexp] OR Liberia[Mesh:noexp] OR Libya[Mesh:noexp] OR Lithuania[Mesh:noexp] OR Macedonia[Mesh:noexp] OR Madagascar[Mesh:noexp] OR Malaysia[Mesh:noexp] OR Malawi[Mesh:noexp] OR Mali[Mesh:noexp] OR Malta[Mesh:noexp] OR Mauritania[Mesh:noexp] OR Mauritius[Mesh:noexp] OR Mexico[Mesh:noexp] OR Micronesia[Mesh:noexp] OR Middle East[Mesh:noexp] OR Moldova[Mesh:noexp] OR Mongolia[Mesh:noexp] OR Montenegro[Mesh:noexp] OR Morocco[Mesh:noexp] OR Mozambique[Mesh:noexp] OR Myanmar[Mesh:noexp] OR Namibia[Mesh:noexp] OR Nepal[Mesh:noexp] OR Netherlands Antilles[Mesh:noexp] OR New Caledonia[Mesh:noexp] OR Nicaragua[Mesh:noexp] OR Niger[Mesh:noexp] OR Nigeria[Mesh:noexp] OR Oman[Mesh:noexp] OR Pakistan[Mesh:noexp] OR Palau[Mesh:noexp] OR Panama[Mesh:noexp] OR Papua New Guinea[Mesh:noexp] OR Paraguay[Mesh:noexp] OR Peru[Mesh:noexp] OR Philippines[Mesh:noexp] OR Poland[Mesh:noexp] OR Portugal[Mesh:noexp] OR Puerto Rico[Mesh:noexp] OR Romania[Mesh:noexp] OR Russia[Mesh:noexp] OR "Russia (Pre |  |
|  | 1917)"[Mesh:noexp] OR Rwanda[Mesh:noexp] OR "Saint Kitts and Nevis"[Mesh:noexp] OR Saint Lucia[Mesh:noexp] OR "Saint Vincent and the Grenadines"[Mesh:noexp] OR Samoa[Mesh:noexp] OR Saudi Arabia[Mesh:noexp] OR Senegal[Mesh:noexp] OR Serbia[Mesh:noexp] OR Montenegro[Mesh:noexp] OR Seychelles[Mesh:noexp] OR Sierra Leone[Mesh:noexp] OR Slovenia[Mesh:noexp] OR Sri Lanka[Mesh:noexp] OR Somalia[Mesh:noexp] OR South Africa[Mesh:noexp] OR Sudan[Mesh:noexp] OR Suriname[Mesh:noexp] OR Swaziland[Mesh:noexp] OR Syria[Mesh:noexp] OR Tajikistan[Mesh:noexp] OR Tanzania[Mesh:noexp] OR Thailand[Mesh:noexp] OR Togo[Mesh:noexp] OR Tonga[Mesh:noexp] OR "Trinidad and Tobago"[Mesh:noexp] OR Tunisia[Mesh:noexp] OR Turkey[Mesh:noexp] OR Turkmenistan[Mesh:noexp] OR Uganda[Mesh:noexp] OR Ukraine[Mesh:noexp] OR Uruguay[Mesh:noexp] OR USSR[Mesh:noexp] OR Uzbekistan[Mesh:noexp] OR Vanuatu[Mesh:noexp] OR Venezuela[Mesh:noexp] OR Vietnam[Mesh:noexp] OR Yemen[Mesh:noexp] OR Yugoslavia[Mesh:noexp] OR Zambia[Mesh:noexp] OR Zimbabwe[Mesh:noexp])) |  |
| **Embase** | | |
| **No.** | **Query** | **Results** |
| #01 | 'developing country'/exp OR 'africa'/exp OR 'asia'/exp OR 'caribbean'/exp OR 'caribbean islands'/exp OR 'south and central america'/exp | **1,630,947** |
| #02 | afghanistan:ti,ab,kw OR albania:ti,ab,kw OR algeria:ti,ab,kw OR angola:ti,ab,kw OR antigua:ti,ab,kw OR barbuda:ti,ab,kw OR argentina:ti,ab,kw OR armenia:ti,ab,kw OR armenian:ti,ab,kw OR aruba:ti,ab,kw OR azerbaijan:ti,ab,kw OR bahrain:ti,ab,kw OR bangladesh:ti,ab,kw OR barbados:ti,ab,kw OR benin:ti,ab,kw OR byelarus:ti,ab,kw OR byelorussian:ti,ab,kw OR belarus:ti,ab,kw OR belorussian:ti,ab,kw OR belorussia:ti,ab,kw OR belize:ti,ab,kw OR bhutan:ti,ab,kw OR bolivia:ti,ab,kw OR bosnia:ti,ab,kw OR herzegovina:ti,ab,kw OR hercegovina:ti,ab,kw OR botswana:ti,ab,kw OR brasil:ti,ab,kw OR brazil:ti,ab,kw OR bulgaria:ti,ab,kw OR 'burkina faso':ti,ab,kw OR 'burkina fasso':ti,ab,kw OR 'upper volta':ti,ab,kw OR burundi:ti,ab,kw OR urundi:ti,ab,kw OR cambodia:ti,ab,kw OR 'khmer republic':ti,ab,kw OR kampuchea:ti,ab,kw OR cameroon:ti,ab,kw OR cameroons:ti,ab,kw OR cameron:ti,ab,kw OR camerons:ti,ab,kw OR 'cape verde':ti,ab,kw OR 'central african republic':ti,ab,kw OR chad:ti,ab,kw OR chile:ti,ab,kw OR china:ti,ab,kw OR colombia:ti,ab,kw OR comoros:ti,ab,kw OR 'comoro islands':ti,ab,kw | **426,901** |
| #03 | comores:ti,ab,kw OR mayotte:ti,ab,kw OR congo:ti,ab,kw OR zaire:ti,ab,kw OR 'costa rica':ti,ab,kw OR 'cote d ivoire':ti,ab,kw OR 'ivory coast':ti,ab,kw OR croatia:ti,ab,kw OR cuba:ti,ab,kw OR cyprus:ti,ab,kw OR czechoslovakia:ti,ab,kw OR 'czech republic':ti,ab,kw OR slovakia:ti,ab,kw OR 'slovak republic':ti,ab,kw OR djibouti:ti,ab,kw OR 'french somaliland':ti,ab,kw OR dominica:ti,ab,kw OR 'dominican republic':ti,ab,kw OR 'east timor':ti,ab,kw OR 'east timur':ti,ab,kw OR 'timor leste':ti,ab,kw OR ecuador:ti,ab,kw OR egypt:ti,ab,kw OR 'united arab republic':ti,ab,kw OR 'el salvador':ti,ab,kw OR eritrea:ti,ab,kw OR estonia:ti,ab,kw OR ethiopia:ti,ab,kw OR fiji:ti,ab,kw OR gabon:ti,ab,kw OR 'gabonese republic':ti,ab,kw OR gambia:ti,ab,kw OR gaza:ti,ab,kw OR 'georgia republic':ti,ab,kw OR 'georgian republic':ti,ab,kw OR ghana:ti,ab,kw OR 'gold coast':ti,ab,kw OR greece:ti,ab,kw OR grenada:ti,ab,kw OR guatemala:ti,ab,kw OR guinea:ti,ab,kw OR guam:ti,ab,kw OR guiana:ti,ab,kw OR guyana:ti,ab,kw OR haiti:ti,ab,kw OR honduras:ti,ab,kw OR hungary:ti,ab,kw OR india:ti,ab,kw OR maldives:ti,ab,kw | **453,610** |
| #04 | indonesia:ti,ab,kw OR iran:ti,ab,kw OR iraq:ti,ab,kw OR 'isle of man':ti,ab,kw OR jamaica:ti,ab,kw OR jordan:ti,ab,kw OR kazakhstan:ti,ab,kw OR kazakh:ti,ab,kw OR kenya:ti,ab,kw OR kiribati:ti,ab,kw OR korea:ti,ab,kw OR kosovo:ti,ab,kw OR kyrgyzstan:ti,ab,kw OR kirghizia:ti,ab,kw OR 'kyrgyz republic':ti,ab,kw OR kirghiz:ti,ab,kw OR kirgizstan:ti,ab,kw OR 'lao pdr':ti,ab,kw OR laos:ti,ab,kw OR latvia:ti,ab,kw OR lebanon:ti,ab,kw OR lesotho:ti,ab,kw OR basutoland:ti,ab,kw OR liberia:ti,ab,kw OR libya:ti,ab,kw OR lithuania:ti,ab,kw OR macedonia:ti,ab,kw OR madagascar:ti,ab,kw OR 'malagasy republic':ti,ab,kw OR malaysia:ti,ab,kw OR malaya:ti,ab,kw OR malay:ti,ab,kw OR sabah:ti,ab,kw OR sarawak:ti,ab,kw OR malawi:ti,ab,kw OR nyasaland:ti,ab,kw OR mali:ti,ab,kw OR malta:ti,ab,kw OR 'marshall islands':ti,ab,kw OR mauritania:ti,ab,kw OR mauritius:ti,ab,kw OR 'agalega islands':ti,ab,kw OR mexico:ti,ab,kw OR micronesia:ti,ab,kw OR 'middle east':ti,ab,kw OR moldova:ti,ab,kw OR moldovia:ti,ab,kw OR moldovian:ti,ab,kw OR mongolia:ti,ab,kw OR montenegro:ti,ab,kw OR morocco:ti,ab,kw OR ifni:ti,ab,kw OR mozambique:ti,ab,kw | **318,433** |
| #05 | (myanmar:ti,ab,kw OR myanma:ti,ab,kw OR burma:ti,ab,kw OR namibia:ti,ab,kw OR nepal:ti,ab,kw OR 'netherlands antilles':ti,ab,kw OR 'new caledonia':ti,ab,kw OR nicaragua:ti,ab,kw OR niger:ti,ab,kw OR nigeria:ti,ab,kw OR 'northern mariana islands':ti,ab,kw OR oman:ti,ab,kw OR muscat:ti,ab,kw OR pakistan:ti,ab,kw OR palau:ti,ab,kw OR palestine:ti,ab,kw OR panama:ti,ab,kw OR paraguay:ti,ab,kw OR peru:ti,ab,kw OR philippines:ti,ab,kw OR philipines:ti,ab,kw OR phillipines:ti,ab,kw OR phillippines:ti,ab,kw OR poland:ti,ab,kw OR portugal:ti,ab,kw OR puerto:ti,ab,kw) AND rico:ti,ab,kw OR romania:ti,ab,kw OR rumania:ti,ab,kw OR roumania:ti,ab,kw OR russia:ti,ab,kw OR russian:ti,ab,kw OR rwanda:ti,ab,kw OR ruanda:ti,ab,kw OR 'saint kitts':ti,ab,kw OR 'st kitts':ti,ab,kw OR nevis:ti,ab,kw OR 'saint lucia':ti,ab,kw OR 'st lucia':ti,ab,kw OR 'saint vincent':ti,ab,kw OR 'st vincent':ti,ab,kw OR grenadines:ti,ab,kw OR samoa:ti,ab,kw OR 'samoan islands':ti,ab,kw OR 'navigator island':ti,ab,kw OR 'navigator islands':ti,ab,kw OR 'sao tome':ti,ab,kw OR 'saudi arabia':ti,ab,kw OR senegal:ti,ab,kw OR serbia:ti,ab,kw OR montenegro:ti,ab,kw | **163,883** |
| #06 | seychelles:ti,ab,kw OR 'sierra leone':ti,ab,kw OR slovenia:ti,ab,kw OR 'sri lanka':ti,ab,kw OR ceylon:ti,ab,kw OR 'solomon islands':ti,ab,kw OR somalia:ti,ab,kw OR 'south africa':ti,ab,kw OR sudan:ti,ab,kw OR suriname:ti,ab,kw OR surinam:ti,ab,kw OR swaziland:ti,ab,kw OR syria:ti,ab,kw OR tajikistan:ti,ab,kw OR tadzhikistan:ti,ab,kw OR tadjikistan:ti,ab,kw OR tadzhik:ti,ab,kw OR tanzania:ti,ab,kw OR thailand:ti,ab,kw OR togo:ti,ab,kw OR 'togolese republic':ti,ab,kw OR tonga:ti,ab,kw OR trinidad:ti,ab,kw OR tobago:ti,ab,kw OR tunisia:ti,ab,kw OR turkey:ti,ab,kw OR turkmenistan:ti,ab,kw OR turkmen:ti,ab,kw OR uganda:ti,ab,kw OR ukraine:ti,ab,kw OR uruguay:ti,ab,kw OR ussr:ti,ab,kw OR 'soviet union':ti,ab,kw OR 'union of soviet socialist republics':ti,ab,kw OR uzbekistan:ti,ab,kw OR uzbek:ti,ab,kw OR vanuatu:ti,ab,kw OR 'new hebrides':ti,ab,kw OR venezuela:ti,ab,kw OR vietnam:ti,ab,kw OR 'viet nam':ti,ab,kw OR 'west bank':ti,ab,kw OR yemen:ti,ab,kw OR yugoslavia:ti,ab,kw OR zambia:ti,ab,kw OR zimbabwe:ti,ab,kw OR rhodesia:ti,ab,kw | **254,265** |
| #07 | (((developing OR 'less developed' OR 'lesser developed' OR 'under developed' OR underdeveloped OR 'middle income' OR 'low income' OR 'lower income' OR underserved OR 'under served' OR deprived OR poor*) NEAR/3 (countr* OR nation? OR population? OR world)):ti,ab) OR (((developing OR 'less developed' OR 'lesser developed' OR 'under developed' OR underdeveloped OR 'middle income' OR 'low income' OR 'lower income') NEAR/3 (economy OR economies)):ti,ab) OR ((low*0 NEAR/3 (gdp OR gnp OR 'gross domestic' OR 'gross national')):ti,ab) OR ((lmic:ti,ab OR lmics:ti,ab OR 'third world':ti,ab OR lami:ti,ab) AND countr*:ti,ab) OR 'transitional country':ti,ab OR 'transitional countries':ti,ab | **128,916** |
| #08 | #1 OR #2 OR #3 OR #4 OR #5 OR #6 OR #7 | **2,350,543** |
| #09 | 'medication compliance'/exp OR (((drug OR drugs OR medicat* OR prescript*) NEAR/3 (adher* OR complian*)):ti,ab) | **52,520** |
| #10 | 'cardiovascular disease'/exp OR (((coronary OR cardiovascular OR heart) NEAR/3 diseas*):ti,ab) OR 'high blood pressure' OR hypertension:ti,ab OR 'elevated blood pressure' | **4,578,282** |
| #11 | #8 AND #9 AND #10 | **1,916** |
| #12 | 'clinical study'/exp OR 'quantitative study'/exp OR 'qualitative research'/exp OR interven*:ti,ab,kw OR program*:ti,ab,kw OR strateg*:ti,ab,kw OR random*:ti,ab,kw OR effective*:ti,ab,kw OR evaluat*:ti,ab,kw OR quantitative:ti,ab,kw OR qualitative:ti,ab,kw | **16,086,625** |
| #13 | #11 AND #12 | **1,731** |
| **CINAHL** | | |
| **No.** | **Query** | **Results** |
| S1 | ( (MH "Developing Countries") OR (MH "Asia+") OR (MH "Africa+") OR (MH "Central America+") OR (MH "Latin America") OR (MH "South America+") OR (MH "West Indies+") OR (MH "Portugal") OR (MH "Greece") OR (MH "Georgia (Republic)") OR (MH "Europe, Eastern+") OR (MH "Armenia") OR (MH "Azerbaijan") OR (MH "Micronesia") OR (MH "Pacific Islands") OR (MH "Low and Middle Income Countries") OR (MH "Indian Ocean Islands+") OR (MH "Melanesia") OR (MH "Samoa+") OR (MH "Mexico") ) OR ( afghanistan OR albania OR algeria OR angola OR antigua OR barbuda OR argentina OR armenia OR armenian OR aruba OR azerbaijan OR bahrain OR bangladesh OR barbados OR benin OR byelarus OR byelorussian OR belarus OR belorussian OR belorussia OR belize OR bhutan OR bolivia OR bosnia OR herzegovina OR hercegovina OR botswana OR brasil OR brazil OR bulgaria OR “burkina faso” OR “burkina fasso” OR “upper volta” OR burundi OR urundi OR cambodia OR “khmer republic” OR kampuchea OR cameroon OR cameroons OR cameron OR camerons OR “cape verde” OR “central african republic” OR chad OR chile OR china OR colombia OR comoros OR “comoro islands” ) OR ( comores OR mayotte OR congo OR zaire OR “costa rica” OR “cote d ivoire” OR “ivory coast” OR croatia OR cuba OR cyprus OR czechoslovakia OR “czech republic” OR slovakia OR “slovak republic” OR djibouti OR “french somaliland” OR dominica OR “dominican republic” OR “east timor” OR “east timur” OR “timor leste” OR ecuador OR egypt OR “united arab republic” OR “el salvador” OR eritrea OR estonia OR ethiopia OR fiji OR gabon OR “gabonese republic” OR gambia OR gaza OR “georgia republic” OR “georgian republic” OR ghana OR “gold coast” OR greece OR grenada OR guatemala OR guinea OR guam OR guiana OR guyana OR haiti OR honduras OR hungary OR india OR maldives ) OR ( indonesia OR iran OR iraq OR “isle of man” OR jamaica OR jordan OR kazakhstan OR kazakh OR kenya OR kiribati OR korea OR kosovo OR kyrgyzstan OR kirghizia OR “kyrgyz republic” OR kirghiz OR kirgizstan OR “lao pdr” OR laos OR latvia OR lebanon OR lesotho OR basutoland OR liberia OR libya OR lithuania OR macedonia OR madagascar OR “malagasy republic” OR malaysia OR malaya OR malay OR sabah OR sarawak OR malawi OR nyasaland OR mali OR malta OR “marshall islands” OR mauritania OR mauritius OR “agalega islands” OR mexico OR micronesia OR “middle east” OR moldova OR moldovia OR moldovian OR mongolia OR montenegro OR morocco OR ifni OR mozambique ) OR ( (myanmar OR myanma OR burma OR namibia OR nepal OR “netherlands antilles” OR “new caledonia” OR nicaragua OR niger OR nigeria OR “northern mariana islands” OR oman OR muscat OR pakistan OR palau OR palestine OR panama OR paraguay OR peru OR philippines OR philipines OR phillipines OR phillippines OR poland OR portugal OR puerto ) AND rico OR romania OR rumania OR roumania OR russia OR russian OR rwanda OR ruanda OR “saint kitts” OR “st kitts” OR nevis OR “saint lucia” OR “st lucia” OR “saint vincent” OR “st vincent” OR grenadines OR samoa OR “samoan islands” OR “navigator island” OR “navigator islands” OR “sao tome” OR “saudi arabia” OR senegal OR serbia OR montenegro ) OR ( seychelles OR “sierra leone” OR slovenia OR “sri lanka” OR ceylon OR “solomon islands” OR somalia OR “south africa” OR sudan OR suriname OR surinam OR swaziland OR syria OR tajikistan OR tadzhikistan OR tadjikistan OR tadzhik OR tanzania OR thailand OR togo OR “togolese republic” OR tonga OR trinidad OR tobago OR tunisia OR turkey OR turkmenistan OR turkmen OR uganda OR ukraine OR uruguay OR ussr OR “soviet union” OR “union of soviet socialist republics” OR uzbekistan OR uzbek OR vanuatu OR “new hebrides” OR venezuela OR vietnam OR “viet nam” OR “west bank” OR yemen OR yugoslavia OR zambia OR zimbabwe OR rhodesia ) | 503,182 |
| S2 | (((developing OR “less developed” OR “lesser developed” OR “under developed” OR underdeveloped OR “middle income” OR “low income” OR “lower income” OR underserved OR “under served” OR deprived OR poor*) N3 (countr* OR nation? OR population? OR world)) ) OR (((developing OR “less developed” OR “lesser developed” OR “under developed” OR underdeveloped OR “middle income” OR “low income” OR “lower income”) N3 (economy OR economies)) ) OR ((low*0 N3 (gdp OR gnp OR “gross domestic” OR “gross national”)) ) OR ((lmic OR lmics OR “third world” OR lami ) AND countr* ) OR “transitional country” OR “transitional countries” | 42,004 |
| S3 | S1 OR S2 | 514,912 |
| S4 | (MH "Medication Compliance") OR ( (((drug OR drugs OR medicat* OR prescript*) N3 (adher* OR complian*))) ) | 44,134 |
| S5 | (MH "Cardiovascular Diseases+") OR ( (((coronary OR cardiovascular OR heart) N3 diseas*) ) OR “high blood pressure” OR hypertension OR “elevated blood pressure” ) | 582,161 |
| S6 | ( (MH "Clinical Trials+") OR (MH "Quantitative Studies") OR (MH "Qualitative Studies+") ) OR ( interven* OR program* OR strateg* OR random* OR effective* OR evaluat* OR quantitative OR qualitative ) | 2,223,034 |
| S7 | S3 AND S4 AND S5 AND S6 | 734 |

**Table S2: Quality Assessment of studies included in the review using Joanna Briggs checklist based on the study type (n=45)**

|  | **Joanna Briggs Institute Critical Appraisal Checklist for randomized controlled trials** | | | | | | | | | | | | |
| --- | --- | --- | --- | --- | --- | --- | --- | --- | --- | --- | --- | --- | --- |
| Author, year | True Randomi-zation | Concealed Allocation | Group similarities | Masking to treatment assignment | | | Identical treatment among groups | Follow-Up completed | Analysis in randomized group | Same outcomes measured | Outcomes measured in a reliable way | Appropriate stats | Appropriate trial design |
|  |  |  |  | Participants | Deliverers | Assessors |  |  |  |  |  |  |  |
| Adeyemo, 2013 | y | y | n | n | n | n | Y | y | y | y | y | y | y |
| Al-Qudah, 2018 | y | n | n | n | n | y | Y | y | n | y | y | y | y |
| Bobrow, 2016 | y | y | y | n | y | y | Y | y | y | y | y | y | y |
| Bonetti, 2018 | y | n | y | n | n | n | Y | y | y | y | y | y | y |
| Chiu, 2010 | y | y | y | n | n | y | Y | y | n | y | y | y | y |
| de Azevedo, 2017 | y | y | y | n | n | n | Y | y | y | y | n | y | y |
| Fang, 2015 | y | y | y | n | n | n | Y | y | y | y | y | y | y |
| Di, 2019 | y | y | n | n | u | u | Y | y | y | y | n | y | y |
| Fang, 2015 | u | y | y | n | y | y | N | y | y | y | y | y | y |
| Farazian, 2019 | y | y | n | n | n | n | Y | y | n | y | y | y | y |
| Furuya, 2014 | y | y | u | u | y | n | Y | n | y | y | y | y | y |
| Golshahi, 2015 | y | n | y | n | n | n | Y | y | y | y | u | y | y |
| Haidari, 2017 | y | u | y | n | n | n | Y | y | y | y | y | y | y |
| Hosseininasab, 2014 | y | y | y | n | n | n | U | y | y | y | y | y | y |
| Huang, 2018 | y | y | y | y | n | n | Y | y | y | y | y | y | y |
| Huo, 2019 | y | y | y | y | n | n | Y | y | y | y | y | y | y |
| Joshi, 2019 | y | y | y | n | n | n | Y | y | y | y | n | y | y |
| Mariani, 2020 | y | y | n | n | n | n | Y | y | y | y | y | y | y |
| Maslakpak, 2016 | y | y | y | n | y | y | Y | n | y | y | y | y | y |
| Najafi, 2016 | y | y | y | n | n | n | Y | y | y | y | y | y | y |
| Nguyen, 2017 | y | y | y | n | n | n | Y | y | n | u | y | y | y |
| Nayeri, 2014 | y | y | y | n | n | n | Y | y | y | y | y | y | y |
| Sarfo, 2017 | y | y | y | u | u | y | Y | y | y | y | y | y | y |
| Sharma, 2016 | y | y | n | u | u | y | Y | y | y | y | y | y | y |
| Sheilini, 2019 | y | y | y | n | n | n | Y | y | y | y | y | y | y |
| Varleta, 2017 | y | y | n | n | y | y | Y | y | y | y | y | y | y |
| Wan, 2018 | y | y | y | n | n | y | Y | y | y | y | y | y | y |
| Xavier, 2016 | y | y | y | n | n | n | Y | y | y | y | y | y | y |
| Yazdanpanah, 2019 | y | y | y | n | n | n | Y | y | y | y | y | y | y |
| Yu, 2015 | y | y | u | n | n | n | Y | y | y | y | y | y | y |
| Zhao, 2015 | y | y | y | n | n | n | Y | y | y | n | y | y | y |
| Zakeri, 2020 | y | u | u | n | n | n | Y | y | y | y | y | y | y |
| **Joanna Briggs Institute Critical Appraisal Checklist for Quasi-Experimental Studies (Non-Randomized Experimental Studies)** | | | | | | | | | | | | | |
|  | Clear cause/Effect | FU completed | Outcomes measured same way | Outcomes measured in reliable way | Appropriate stats analysis |  |  |  |  |  |  |  |  |
| Aguiar, 2012 | y | n | y | y | y |  |  |  |  |  |  |  |  |
| Calano, 2019 | y | y | y | y | y |  |  |  |  |  |  |  |  |
| Siang, 2019 | y | y | y | y | y |  |  |  |  |  |  |  |  |
| de Souza, 2016 | y | y | y | y | y |  |  |  |  |  |  |  |  |
| Odusola, 2015 | y | y | y | y | y |  |  |  |  |  |  |  |  |
| Saleem, 2015 | y | y | y | y | y |  |  |  |  |  |  |  |  |
| Sundararajan | y | y | y | y | y |  |  |  |  |  |  |  |  |
| Tankumpuan, 2019 | y | y | y | y | y |  |  |  |  |  |  |  |  |
| Woodham, 2020 | y | y | y | y | y |  |  |  |  |  |  |  |  |
| **Joanna Briggs Institute Critical Appraisal Checklist for Cohort Studies** | | | | | | | | | | | | | |
|  | Similar groups | Exposures measured similarly | Exposure measured in a reliable way | Confounding factors identified | Confounding controlled for | Participants free of outcome at baseline | Outcomes measured in reliable way | Follow-up time reported | Follow-up time complete | Incomplete follow-up addressed | Appropriate stats analysis |  |  |
| Hsu, 2014 | y | y | y | y | y | n | Y | y | y | y | y |  |  |

**Table S3: Analysis of the type of methods used to measure medication adherence in the studies (N=45)**

| **Author, year** | **Type of Medication Adherence Measurement Method** | | | | | | | |
| --- | --- | --- | --- | --- | --- | --- | --- | --- |
|  | **Direct** | | **Indirect** | | | | | |
|  | Serum/  Urine levels | Directly Observed Therapy | Scales | Pill count | Pharmacy/  chart records | Validated Questionnaire or single item question | Medication Possession Ratio | Others |
| Adeyemo, 2013 |  |  |  |  |  |  |  |  |
| Aguiar, 2012 |  |  |  |  |  |  |  |  |
| Al-Qudah, 2018 |  |  |  |  |  |  |  |  |
| Alhalaiqa, 2012 |  |  |  |  |  |  |  |  |
| Bobrow, 2016 |  |  |  |  |  |  |  |  |
| Bonetti, 2018 |  |  |  |  |  |  |  |  |
| Calano, 2019 |  |  |  |  |  |  |  |  |
| de Azevedo, 2017 |  |  |  |  |  |  |  |  |
| De Souza, 2016 |  |  |  |  |  |  |  |  |
| Di. 2019 |  |  |  |  |  |  |  |  |
| Fang, 2015 |  |  |  |  |  |  |  |  |
| Farazian, 2019 |  |  |  |  |  |  |  |  |
| Golshahi, 2015 |  |  |  |  |  |  |  |  |
| Haidari, 2017 |  |  |  |  |  |  |  |  |
| Hosseininasab, 2017 |  |  |  |  |  |  |  |  |
| Hsu, 2014 |  |  |  |  |  |  |  |  |
| Huang, 2018 |  |  |  |  |  |  |  |  |
| Huo, 2019 |  |  |  |  |  |  |  |  |
| Joshi, 2019 |  |  |  |  |  |  |  |  |
| Kamal. 2015 |  |  |  |  |  |  |  |  |
| Kamal. 2018 |  |  |  |  |  |  |  |  |
| Lourenco, 2014 |  |  |  |  |  |  |  |  |
| Mariani, 2020 |  |  |  |  |  |  |  |  |
| Morgado, 2011 |  |  |  |  |  |  |  |  |
| Nguyen, 2017 |  |  |  |  |  |  |  |  |
| Najafi, 2016 |  |  |  |  |  |  |  |  |
| Nayeri, 2014 |  |  |  |  |  |  |  |  |
| Odusola, 2015 |  |  |  |  |  |  |  |  |
| Saleem, 2015 |  |  |  |  |  |  |  |  |
| Sundararajan, 2020 |  |  |  |  |  |  |  |  |
| Sarfo, 2017 |  |  |  |  |  |  |  |  |
| Siang, 2019 |  |  |  |  |  |  |  |  |
| Sharma, 2016 |  |  |  |  |  |  |  |  |
| Sheilini, 2019 |  |  |  |  |  |  |  |  |
| Tankunpuan, 2019 |  |  |  |  |  |  |  |  |
| Varleta, 2017 |  |  |  |  |  |  |  |  |
| Wan, 2018 |  |  |  |  |  |  |  |  |
| Woodham, 2020 |  |  |  |  |  |  |  |  |
| Xavier, 2016 |  |  |  |  |  |  |  |  |
| Yazdanpanah, 2019 |  |  |  |  |  |  |  |  |
| Yu, 2015 |  |  |  |  |  |  |  |  |
| Zakeri, 2020 |  |  |  |  |  |  |  |  |
| Zhao, 2015 |  |  |  |  |  |  |  |  |
